# Supplementary material
Source: HighWire-hosted journal article supplement (http://heart.bmjjournals.com/highwire/filestream/125092/field_highwire_adjunct_files/0/922266webrefs.pdf)
Supplement: 922266webrefs.pdf [file 922266webrefs.pdf]

## Catheter and surgical ablation of atrial fibrillation (ht67389)

MJ Earley, RJ Schilling

### Web only refs

1. Petch MC. Coronary angioplasty: time for reappraisal. *Br.Med.J (Clin.Res.Ed)* 1987;**295**:453–4.
2. Pacifico A, Henry PD. Ablation for atrial fibrillation: are cures really achieved? *J Am. Coll. Cardiol* 2004;**43**:1940–2.
3. Wellens HJ. Pulmonary vein ablation in atrial fibrillation: hype or hope? *Circulation* 2000;**102**:2562–4.
4. Konings KT, Kirchhof CJ, Smeets JR, *et al.* High-density mapping of electrically induced atrial fibrillation in humans. *Circulation* 1994;**89**:1665–80.
5. Moe GK, Abildskov JA. Atrial fibrillation as a self-sustaining arrhythmia independent of focal discharge. *Am.Heart J* 1959;**58**:59–70.
6. Kato T, Yamashita T, Sagara K, *et al.* Progressive nature of paroxysmal atrial fibrillation. Observations from a 14-year follow-up study. *Circ.J* 2004;**68**:568–72.
7. Kopecky SL, Gersh BJ, McGoon MD, *et al.* The natural history of lone atrial fibrillation. A population-based study over three decades. *N.Engl.J Med* 1987;**317**:669–74.
8. Cox JL, Ad N, Palazzo T, *et al.* Current status of the Maze procedure for the treatment of atrial fibrillation. *Semin.Thorac.Cardiovasc Surg* 2000;**12**:15–9.
9. Prasad SM, Maniar HS, Camillo CJ, *et al.* The Cox maze III procedure for atrial fibrillation: long-term efficacy in patients undergoing lone versus concomitant procedures. *J Thorac.Cardiovasc Surg* 2003;**126**:1822–8.
10. Kim YJ, Sohn DW, Park DG, *et al.* Restoration of atrial mechanical function after maze operation in patients with structural heart disease. *Am.Heart J* 1998;**136**:1070–4.
11. Yuda S, Nakatani S, Kosakai Y, *et al.* Long-term follow-up of atrial contraction after the maze procedure in patients with mitral valve disease. *J Am.Coll.Cardiol* 2001;**37**:1622–7.
12. Schaff HV, Dearani JA, Daly RC, *et al.* Cox-Maze procedure for atrial fibrillation: Mayo Clinic experience. *Semin.Thorac.Cardiovasc Surg* 2000;**12**:30–7.
13. Cox JL, Ad N, Palazzo T. Impact of the maze procedure on the stroke rate in patients with atrial fibrillation. *J Thorac.Cardiovasc Surg* 1999;**118**:833–40.
14. Cox JL. Atrial fibrillation II: rationale for surgical treatment. *J Thorac.Cardiovasc Surg* 2003;**126**:1693–9.
15. Gaita F, Riccardi R, Caponi D, *et al.* Linear cryoablation of the left atrium versus pulmonary vein cryoisolation in patients with permanent atrial fibrillation and valvular heart disease: correlation of electroanatomic mapping and long-term clinical results. *Circulation* 2005;**111**:136–42.
16. Todd DM, Skanes AC, Guiraudon G, *et al.* Role of the posterior left atrium and pulmonary veins in human lone atrial fibrillation: electrophysiological and pathological data from patients undergoing atrial fibrillation surgery. *Circulation* 2003;**108**:3108–14.

17. Harada A, Sasaki K, Fukushima T, *et al.* Atrial activation during chronic atrial fibrillation in patients with isolated mitral valve disease. *Ann.Thorac.Surg* 1996;**61**:104–11.
18. Mandapati R, Skanes A, Chen J, *et al.* Stable microreentrant sources as a mechanism of atrial fibrillation in the isolated sheep heart. *Circulation* 2000;**101**:194–9.
19. Mansour M, Mandapati R, Berenfeld O, *et al.* Left-to-right gradient of atrial frequencies during acute atrial fibrillation in the isolated sheep heart. *Circulation* 2001;**103**:2631–6.
20. Gillinov AM, McCarthy PM, Blackstone EH, *et al.* Surgical ablation of atrial fibrillation with bipolar radiofrequency as the primary modality. *J Thorac.Cardiovasc Surg* 2005;**129**:1322–9.
21. Molloy TA. Midterm clinical experience with microwave surgical ablation of atrial fibrillation. *Ann.Thorac.Surg* 2005;**79**:2115–8.
22. Mohr FW, Fabricius AM, Falk V, *et al.* Curative treatment of atrial fibrillation with intraoperative radiofrequency ablation: short-term and midterm results. *J Thorac.Cardiovasc Surg* 2002;**123**:919–27.
23. Garrido MJ, Williams M, Argenziano M. Minimally invasive surgery for atrial fibrillation: toward a totally endoscopic, beating heart approach. *J Card Surg* 2004;**19**:216–20.
24. Cappato R, Calkins H, Chen SA, *et al.* Worldwide Survey on the Methods, Efficacy, and Safety of Catheter Ablation for Human Atrial Fibrillation. *Circulation* 2005;**111**:1100–5.
25. Macle L, Jais P, Scavee C, *et al.* Electrophysiologically guided pulmonary vein isolation during sustained atrial fibrillation. *J Cardiovasc Electrophysiol* 2003;**14**:255–60.
26. Oral H, Knight BP, Ozaydin M, *et al.* Segmental ostial ablation to isolate the pulmonary veins during atrial fibrillation: feasibility and mechanistic insights. *Circulation* 2002;**106**:1256–62.
27. Hocini M, Sanders P, Jais P, *et al.* Prevalence of pulmonary vein disconnection after anatomical ablation for atrial fibrillation: consequences of wide atrial encircling of the pulmonary veins. *Eur Heart J* 2005;**26**:696–704.
28. Haissaguerre M, Jais P, Shah DC, *et al.* Electrophysiological end point for catheter ablation of atrial fibrillation initiated from multiple pulmonary venous foci. *Circulation* 2000;**101**:1409–17.
29. Stabile G, Turco P, La RV, *et al.* Is pulmonary vein isolation necessary for curing atrial fibrillation? *Circulation* 2003;**108**:657–60.
30. Haissaguerre M, Jais P, Shah DC, *et al.* Electrophysiological end point for catheter ablation of atrial fibrillation initiated from multiple pulmonary venous foci. *Circulation* 2000;**101**:1409–17.
31. Stabile G, Turco P, La RV, *et al.* Is pulmonary vein isolation necessary for curing atrial fibrillation? *Circulation* 2003;**108**:657–60.
32. Haissaguerre M, Jais P, Shah DC, *et al.* Catheter ablation of chronic atrial fibrillation targeting the reinitiating triggers. *J Cardiovasc Electrophysiol* 2000;**11**:2–10.
33. Kanagaratnam L, Tomassoni G, Schweikert R, *et al.* Empirical pulmonary vein isolation in patients with chronic atrial fibrillation using a three-dimensional

- nonfluoroscopic mapping system: long-term follow-up. *Pacing Clin. Electrophysiol* 2001;**24**:1774–9.
34. Oral H, Knight BP, Tada H, *et al.* Pulmonary vein isolation for paroxysmal and persistent atrial fibrillation. *Circulation* 2002;**105**:1077–81.
  35. Cannom DS. Atrial fibrillation: nonpharmacologic approaches. *Am.J Cardiol* 2000;**85**:25D–35D.
  36. Swartz JF, Pellersels G, Silvers J, *et al.* A catheter based curative approach to atrial fibrillation in humans (abstract). *Circulation* 1994;90I335.
  37. Calo L, Lamberti F, Loricchio ML, *et al.* Long-term follow-up of right atrial ablation in patients with atrial fibrillation. *J Cardiovasc Electrophysiol* 2004;**15**:37–43.
  38. Ernst S, Schluter M, Ouyang F, *et al.* Modification of the substrate for maintenance of idiopathic human atrial fibrillation: efficacy of radiofrequency ablation using nonfluoroscopic catheter guidance. *Circulation* 1999;**100**:2085–92.
  39. Garg A, Finneran W, Mollerus M, *et al.* Right atrial compartmentalization using radiofrequency catheter ablation for management of patients with refractory atrial fibrillation. *J Cardiovasc Electrophysiol* 1999;**10**:763–71.
  40. Kilicaslan F, Verma A, Yamaji H, *et al.* The need for atrial flutter ablation following pulmonary vein antrum isolation in patients with and without previous cardiac surgery. *J Am. Coll. Cardiol* 2005;**45**:690–6.
  41. Oral H, Chugh A, Lemola K, *et al.* Noninducibility of atrial fibrillation as an end point of left atrial circumferential ablation for paroxysmal atrial fibrillation: a randomized study. *Circulation* 2004;**110**:2797–801.
  42. Earley MJ, Abrams DJR, Staniforth AD, *et al.* Catheter ablation of permanent atrial fibrillation: medium term results. *Heart* 2005 **IN THIS ISSUE**
  43. Sanders P, Jais P, Hocini M, *et al.* Electrophysiologic and clinical consequences of linear catheter ablation to transect the anterior left atrium in patients with atrial fibrillation. *Heart Rhythm* 2004;**1**:176–84.
  44. Seidl K, Schwacke H, Zahn R, *et al.* Catheter ablation of chronic atrial fibrillation with noncontact mapping: are continuous linear lesions associated with ablation success? *Pacing Clin. Electrophysiol* 2003;**26**:534–43.
  45. Macle L, Jais P, Weerasooriya R, *et al.* Irrigated-tip catheter ablation of pulmonary veins for treatment of atrial fibrillation. *J Cardiovasc Electrophysiol* 2002;**13**:1067–73.
  46. Saad EB, Rossillo A, Saad CP, *et al.* Pulmonary vein stenosis after radiofrequency ablation of atrial fibrillation: functional characterization, evolution, and influence of the ablation strategy. *Circulation* 2003;**108**:3102–7.
  47. Qureshi AM, Prieto LR, Latson LA, *et al.* Transcatheter angioplasty for acquired pulmonary vein stenosis after radiofrequency ablation. *Circulation* 2003;**108**:1336–42.
  48. Pappone C, Oral H, Santinelli V, *et al.* Atrio-esophageal fistula as a complication of percutaneous transcatheter ablation of atrial fibrillation. *Circulation* 2004;**109**:2724–6.
  49. Deneke T, Khargi K, Grewe PH, *et al.* Efficacy of an additional MAZE procedure using cooled-tip radiofrequency ablation in patients with chronic atrial fibrillation and mitral valve disease. A randomized, prospective trial. *Eur. Heart J* 2002;**23**:558–66.

50. Schuetz A, Schulze CJ, Sarvanakis KK, *et al.* Surgical treatment of permanent atrial fibrillation using microwave energy ablation: a prospective randomized clinical trial. *Eur.J Cardiothorac.Surg* 2003;**24**:475–80.
51. Sie HT, Beukema WP, Elvan A, *et al.* Long-term results of irrigated radiofrequency modified maze procedure in 200 patients with concomitant cardiac surgery: six years experience. *The Annals of Thoracic Surgery* 2004;**77**:512–7.
52. Deisenhofer I, Schneider MA, Bohlen-Knauf M, *et al.* Circumferential mapping and electric isolation of pulmonary veins in patients with atrial fibrillation. *Am.J Cardiol* 2003;**91**:159–63.
53. Marrouche NF, Dresing T, Cole C, *et al.* Circular mapping and ablation of the pulmonary vein for treatment of atrial fibrillation: impact of different catheter technologies. *J Am.Coll.Cardiol* 2002;**40**:464–74.
54. Tse HF, Reek S, Timmermans C, *et al.* Pulmonary vein isolation using transvenous catheter cryoablation for treatment of atrial fibrillation without risk of pulmonary vein stenosis. *J Am.Coll.Cardiol* 2003;**42**:752–8.
